# Supplementary material
Source: PubMed Central journal article supplement (PMC4388176)
Supplement: f-71-00414-sup1.pdf [file f-71-00414-sup1.pdf]

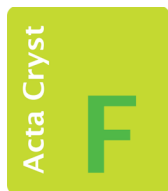

STRUCTURAL BIOLOGY  
COMMUNICATIONS

**Volume 71 (2015)**

**Supporting information for article:**

**Crystallization and preliminary X-ray characterization of the eukaryotic replication terminator Reb1–Ter DNA complex**

**Rahul Jaiswal, Samarendra K. Singh, Deepak Bastia and Carlos R. Escalante**

| <b>Table s1</b>                                    |                                                             |          |             |
|----------------------------------------------------|-------------------------------------------------------------|----------|-------------|
| Ter 3 DNA sites used for Crystallization screening |                                                             |          |             |
| Name                                               | Sequence                                                    | Crystals | Diffraction |
| Ter3-20                                            | GAAAGGTAAGGGTAATGCAC<br>CTTTCATTCCCATTACGTG                 | No       | na          |
| Ter3-21                                            | GCAAGGTAAGGGTAATGCACC<br>GTTCCATTCCCATTACGTGGC              | No       | na          |
| Ter3-22a                                           | TTCAAGGTAAGGGTAATGCACC<br>GTTCCATTCCCATTACGTGGAA            | Yes      | 9-7 Å       |
| Ter3-22b                                           | GGCAAGGTAAGGGTAATGCACC<br>GTTCCATTCCCATTACGTGGCC            | Yes      | 6 Å         |
| Ter3-23                                            | GTAAGGGTAAGGGTAAGGGTAAG<br>TTCCCATTCCCATTCCCATTAC           | No       | na          |
| Ter3-26a                                           | CGAAAAGGTAAGGGTAATGCACCTTT<br>CTTTTCATTCCCATTACGTGAAAAG     | No       | na          |
| Ter3-26b                                           | GTAAAAGGTAAGGGTAATGCACCTTT<br>ATTTTCATTCCCATTACGTGAAAAC     | Yes      | 3 Å         |
| Ter3-28                                            | ATGTAAAAGGTAAGGGTAATGCACCTTT<br>ACATTTTCATTCCCATTACGTGAAAAT | No       | na          |
